# Supplementary material
Source: publisher figshare collection journal article supplement (https://acs.figshare.com/ndownloader/files/3708700)
Supplement: Supplementary file 1 [file 3708700]

Supplementary Information for:

Reversible, selective trapping of perchlorate from  
water in record capacity by a cationic metal-organic  
framework

*Ian R. Colinas, Rachel C. Silva and Scott R. J. Oliver\**

*E-mail: soliver@ucsc.edu*

University of California, Santa Cruz, Department of Chemistry and Biochemistry,  
1156 High Street, Santa Cruz, California, 95064, United States

Submission to: Environmental Science & Technology

Number of Pages: 9

Number of Tables: 1

Number of Figures: 9

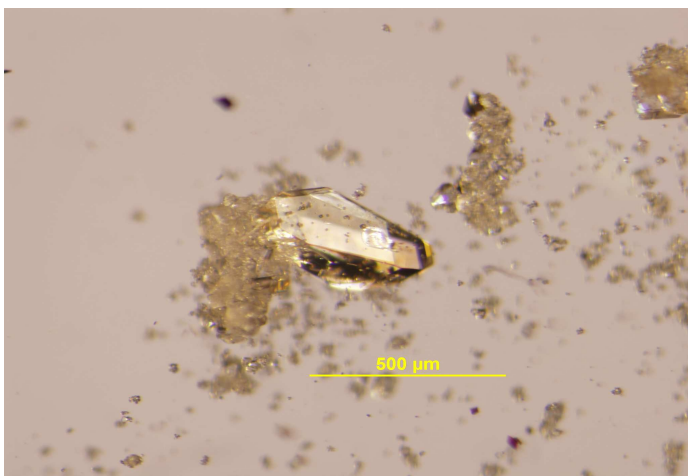

**Figure S1.** Optical micrograph of Hydrothermal SBN.

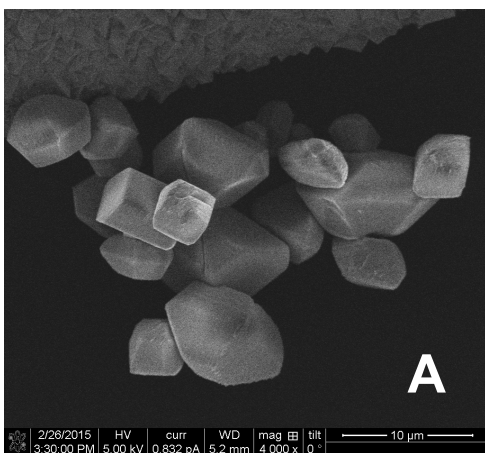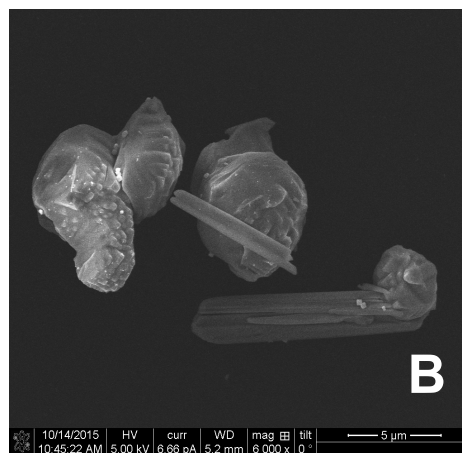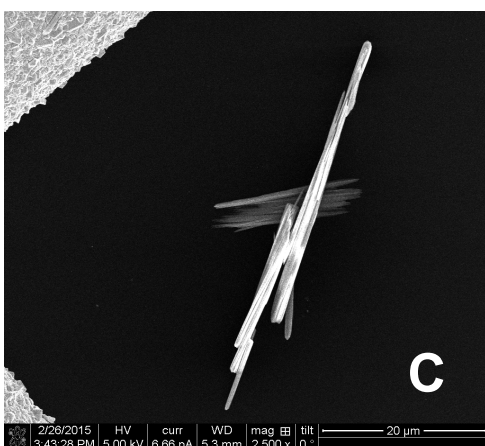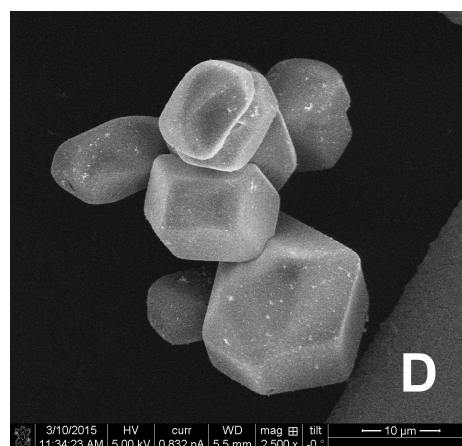

**Figure S2.** SEM images of: (a) SBN; (b) SBN/SBP after 20 min exposure to perchlorate solution; (c) SBP after 70 min exposure to perchlorate solution; (d) 2-SBN (first cycle of regenerated SBN).

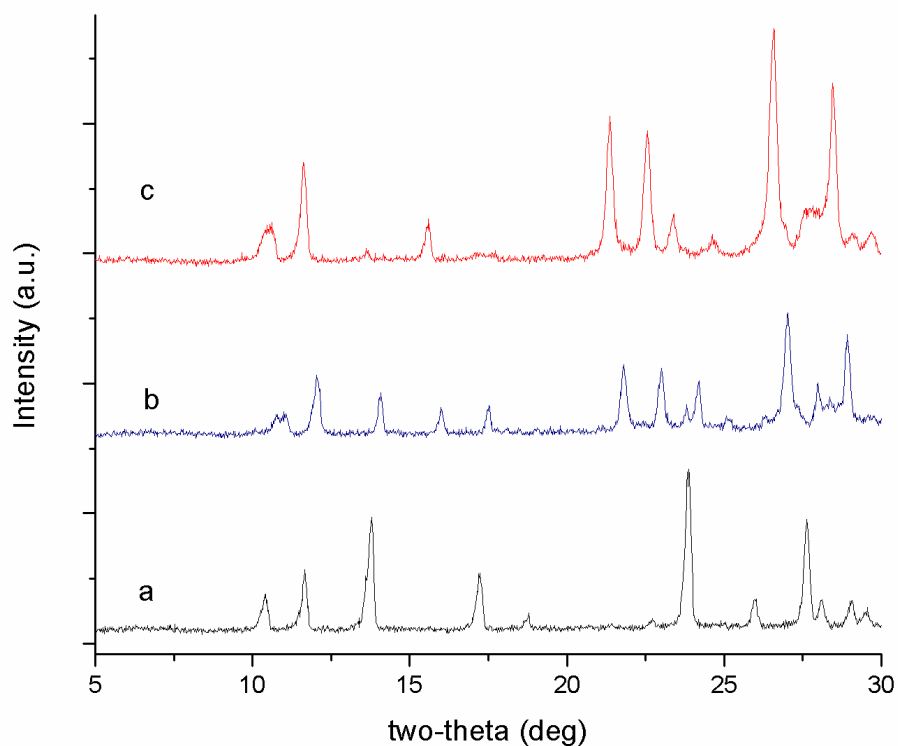

**Figure S3.** PXRD of SBN perchlorate trapping kinetics: (a) SBN pre-exchange; (b) SBN/SBP mixture 20 minutes into the exchange; (c) SBP after 70 minutes and complete exchange.

**Table S1.** Adsorption capacities of perchlorate trapping cycles by SBN

| Cycle No.      | 1 <sup>st</sup> | 2 <sup>nd</sup> | 3 <sup>rd</sup> | 4 <sup>th</sup> | 5 <sup>th</sup> | 6 <sup>th</sup> | 7 <sup>th</sup> |
|----------------|-----------------|-----------------|-----------------|-----------------|-----------------|-----------------|-----------------|
| <b>mol/mol</b> | 1.129           | 0.868           | 0.815           | 0.796           | 1.081           | 0.709           | 0.641           |
| <b>mg/g</b>    | 344.36          | 264.93          | 248.63          | 243.05          | 329.86          | 216.35          | 195.59          |
| <b>meq/g</b>   | 3.463           | 2.664           | 2.500           | 2.444           | 3.316           | 2.175           | 1.966           |

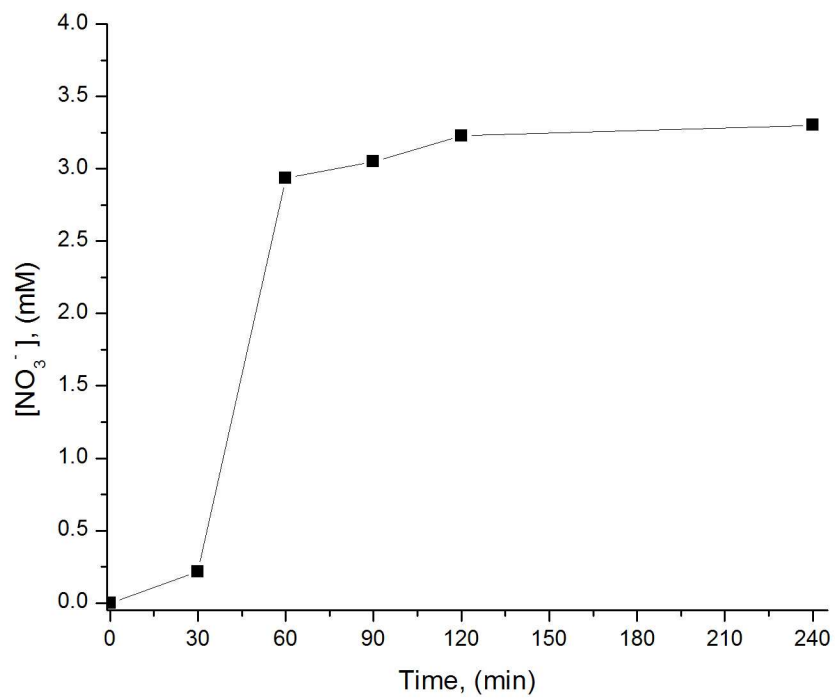

**Figure S4.** SBN nitrate release versus time for stoichiometric anion exchange with perchlorate.

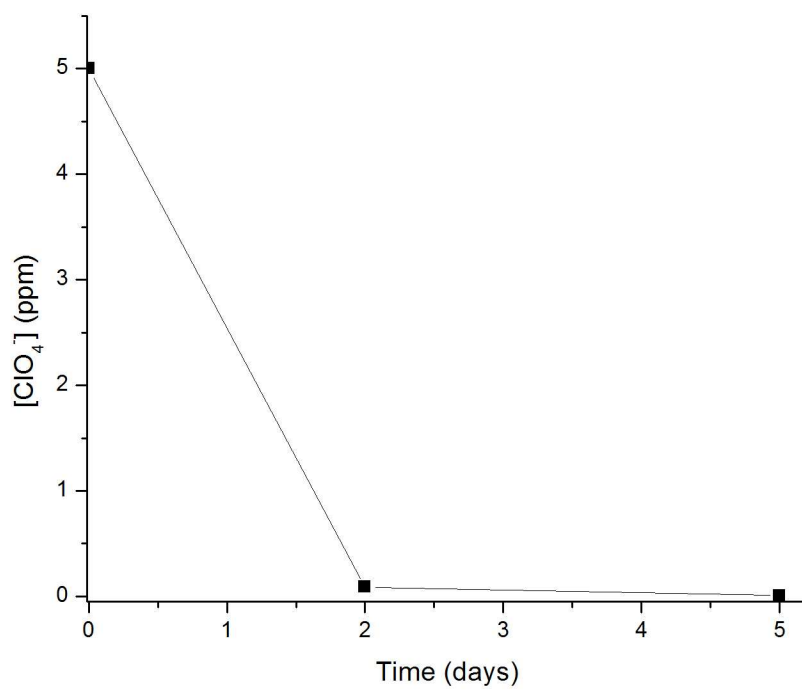

**Figure S5.** 5 ppm perchlorate removal by SBN.

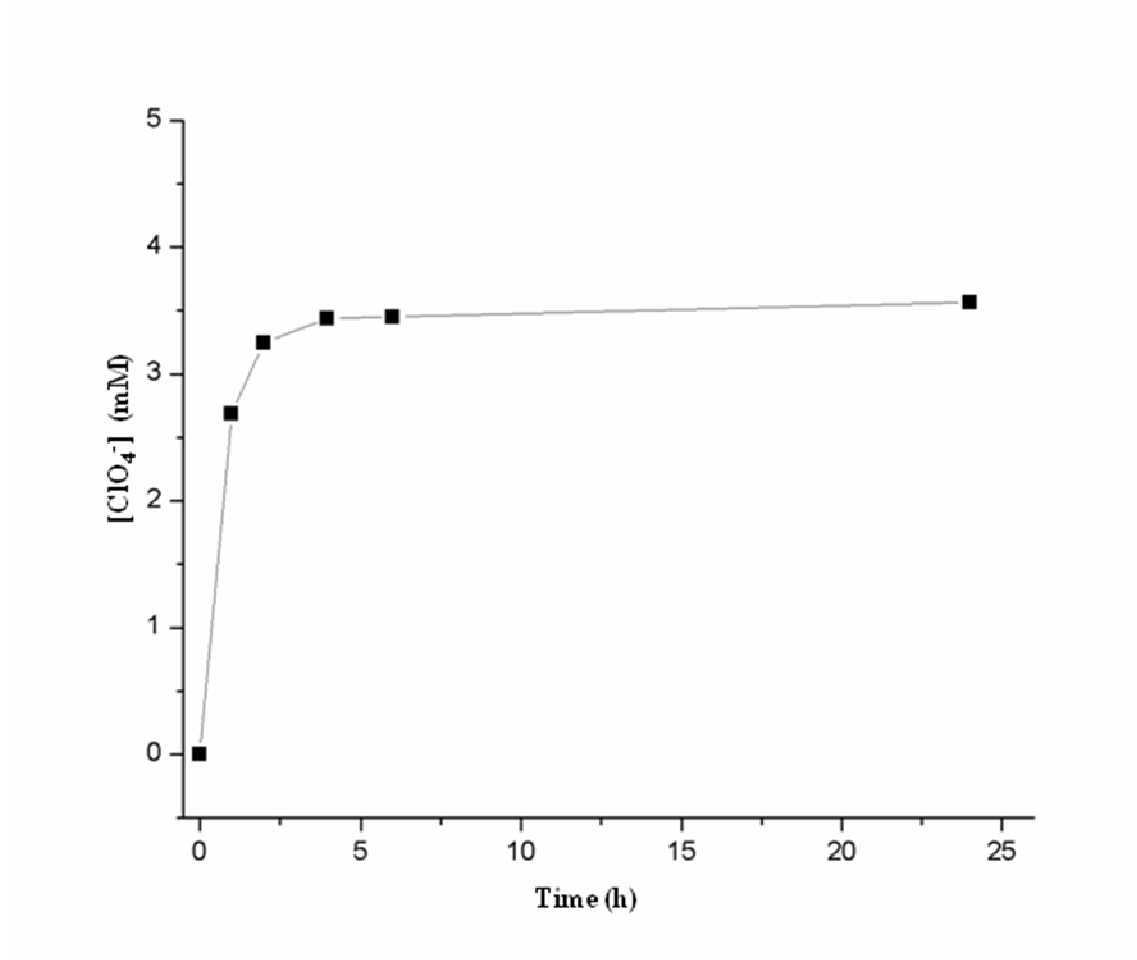

**Figure S6.** SBN regeneration: plot of perchlorate release from SBP versus time in 20-fold molar excess sodium nitrate solution.

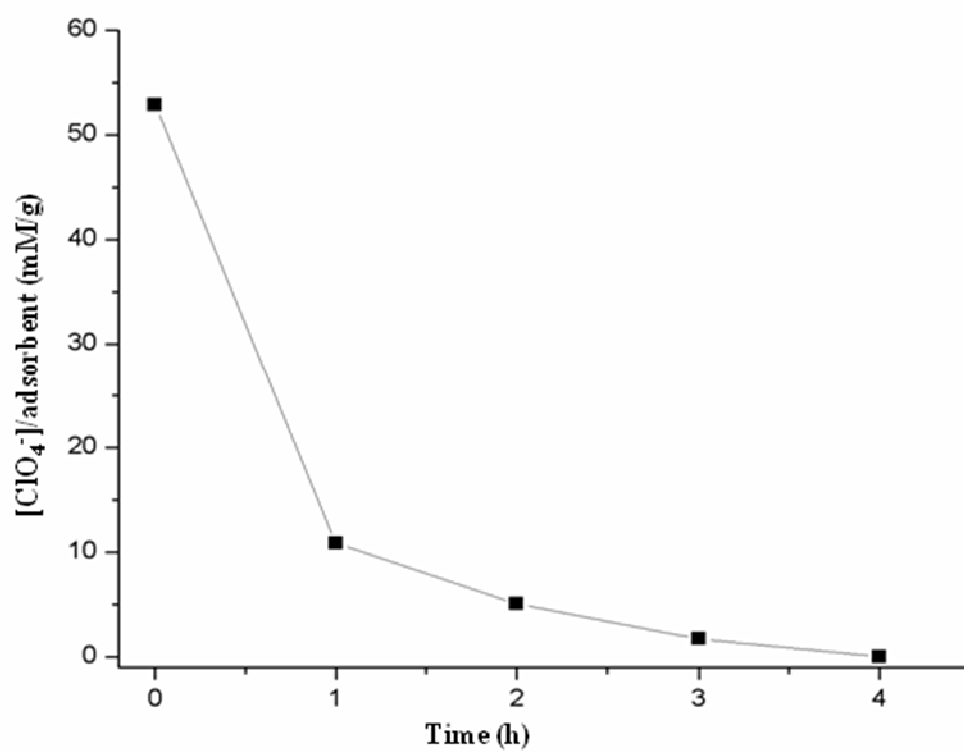

**Figure S7.** Second cycle perchlorate uptake per gram of SBN solid versus time.

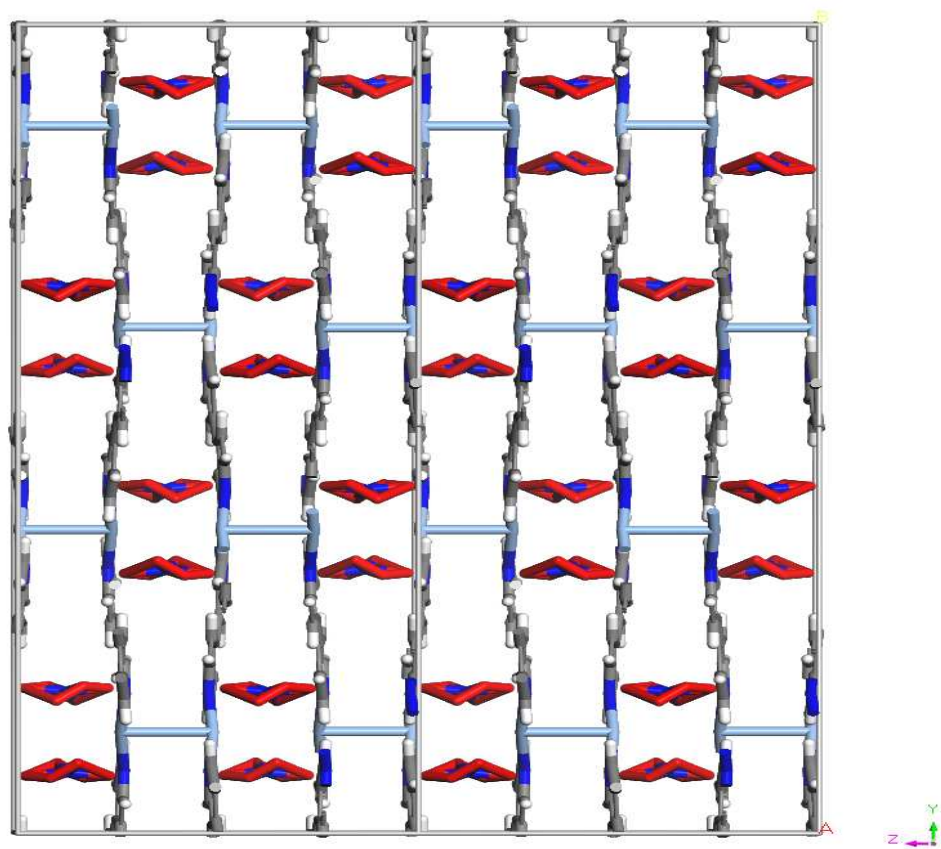

**Figure S8.** Crystallographic view of SBN with partially disordered nitrates included.



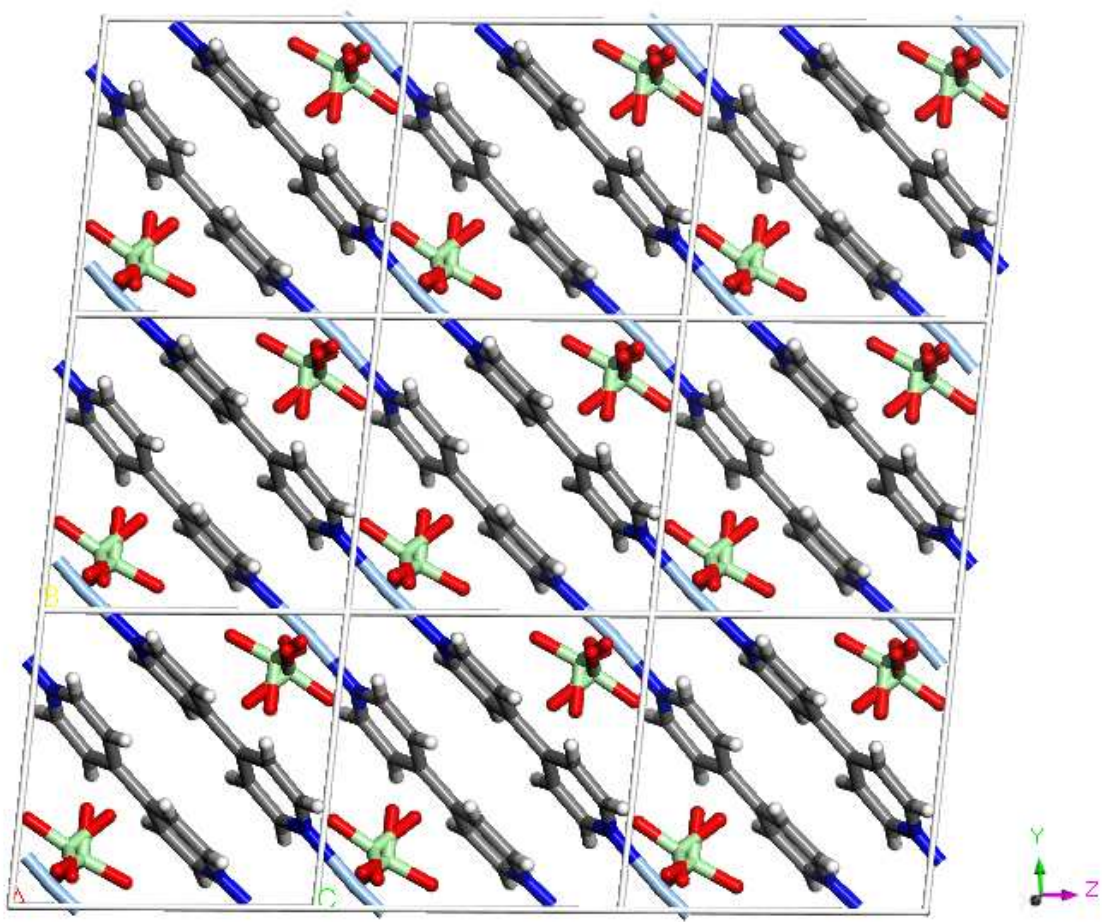

**Figure S9.** Crystallographic view of SBP with disordered perchlorates included.
